# Supplementary material for: Scalable production of bifunctional ordered PtFe alloy electrocatalysts for efficient methanol oxidation and hydrogen evolution
Source: Royal Society of Chemistry journal article supplement (doi:10.1039/d3qi01993d), 2024-01-01
Supplement: d3qi01993d1.pdf [file d3qi01993d1.pdf]

## Supporting information

1  
2  
3  
4  
5  
6  
7  
8  
9  
10  
11  
12  
13  
14  
15  
16  
17  
18  
19  
20  
21  
22

### Scalable production of bifunctional ordered PtFe alloy electrocatalysts for efficient methanol oxidation and hydrogen evolution

Xuxu Sun,<sup>a,b,‡</sup> Ruiqi Wang,<sup>a,b,‡</sup> Qi Wang,<sup>a,b,c\*</sup> Kostya (Ken) Ostrikov<sup>d</sup>

<sup>a</sup> *Institute of Plasma Physics, Hefei Institutes of Physical Science, Chinese Academy of Sciences, Hefei 230031 Anhui, China*

<sup>b</sup> *University of Science and Technology of China, Hefei 230026 Anhui, China*

<sup>c</sup> *College of Chemical Engineering, Sichuan University of Science and Engineering, Zigong 643000, China*

<sup>d</sup> *School of Chemistry and Physics and QUT Centre for Materials Science, Queensland University of Technology (QUT), Brisbane, QLD 4000, Australia*

<sup>‡</sup> These authors contributed equally to this work;

**Corresponding Author:** Qi Wang, E-mail: [qiwang@ipp.ac.cn](mailto:qiwang@ipp.ac.cn);

**ORCID:**

Qi Wang: 0000-0003-3594-2244;

Kostya (Ken) Ostrikov: 0000-0001-8672-9297.

## 23 **Experimental details**

24 **Chemicals:** Iron (II) sulfate heptahydrate ( $\text{FeSO}_4 \cdot 7\text{H}_2\text{O}$ , 99%), chloroplatinic acid hexahydrate  
25 ( $\text{H}_2\text{PtCl}_6 \cdot 6\text{H}_2\text{O}$ , 99%), zinc nitrate hexahydrate ( $\text{Zn}(\text{NO}_3)_2 \cdot 6\text{H}_2\text{O}$ ), 2,2'-bipyridine ( $\text{C}_{10}\text{H}_8\text{N}_2$ , 99%),  
26 dopamine hydrochloride ( $\text{C}_8\text{H}_{11}\text{NO}_2\text{HCl}$ , 98%), 2-methylimidazole ( $\text{C}_4\text{H}_6\text{N}_2$ , 98%), absolute ethanol  
27 ( $\text{C}_2\text{H}_5\text{OH}$ , 99.7%), absolute methanol ( $\text{CH}_3\text{OH}$ , 99.5%) and ammonia ( $\text{NH}_3 \cdot \text{H}_2\text{O}$ , 25-28%) were  
28 purchased from Shanghai Aladdin Biochemical Technology Co., Ltd., China. Sulfuric acid ( $\text{H}_2\text{SO}_4$ ,  
29 98%) was purchased from Sinopharm Chemical Reagent Co., Ltd., China. Nafion D520 membrane  
30 solution (5 wt%) and commercial JM-20%Pt/C were purchased from Shanghai Hesun Electric Co.,  
31 Ltd., China. All the chemicals were used as received without any further treatment. Deionized water  
32 was obtained from an ultra-pure purification system.

33 **Preparation of the High Nitrogen-Content Carbon (HNC):** The HNC powder was prepared  
34 according to the previous work with slight modification.<sup>1</sup> Firstly, 14.88 g of Zinc nitrate hexahydrate  
35 and 16.22 g of 2-methylimidazole were respectively weighed and dissolved into 400 mL of methanol  
36 solution and ultrasonicated for 10 minutes. Then, the 2-methylimidazole solution was quickly poured  
37 into the zinc nitrate hexahydrate solution and ultrasonicated them until milky white precipitate  
38 appeared. After standing for overnight, the milky white precipitate was cleaned and centrifugated with  
39 deionized water and anhydrous ethanol for three times and finally was dried at 60 °C for overnight to  
40 obtain ZIF-8 precursor powder. After that, 3 g of ZIF-8 precursor powder was weighed and well  
41 dispersed into a mixed solution (1000 mL deionized water, 400 mL anhydrous ethanol, and 10 mL  
42 ammonia) by sonicating it for 30 minutes. Meanwhile, 500 mg of dopamine hydrochloride was  
43 dissolved into a mixed solution (60 mL deionized water and 40 mL anhydrous ethanol) and stirred for  
44 30 minutes. Then, the dopamine hydrochloride mixed solution was poured into the ZIF-8 dispersion  
45 and continuously stirred for overnight at room temperature. The brown precipitate was cleaned and  
46 centrifuged for three times with deionized water and anhydrous ethanol and finally dried for overnight  
47 at 60 °C to obtain the ZIF-8@polydopamine precursor powder. After that, the obtained ZIF-  
48 8@polydopamine precursor powder was annealed at 900 °C in an argon atmosphere for 2 hours and  
49 then naturally cooled down to obtain the HNC powder.

50 **Preparation of the PtFe@HNC electrocatalyst:** The PtFe compound powder was prepared based on  
51 the previous work with slight modification.<sup>2</sup> Specifically, 2 mmol of iron(II) sulfate heptahydrate was

52 weighed and dissolved into 60 mL of deionized water and stirred for 10 minutes. Meanwhile, 6 mmol  
53 of 2,2'-bipyridine (bpy) was weighed and dissolved into 60 mL of anhydrous ethanol and stirred for  
54 10 minutes. Then, the 2,2'-bipyridine ethanol solution was added to the  $\text{FeSO}_4 \cdot 7\text{H}_2\text{O}$  solution to form  
55 a deep-red complex solution and continuously stirred for overnight. Subsequently, 60 mL of ethanol  
56 solution containing 2 mmol  $\text{H}_2\text{PtCl}_6 \cdot 6\text{H}_2\text{O}$  was gradually added to produce a bright-red precipitate and  
57 stirred continuously for more than 5 hours. After that, the bright-red PtFe compound precipitate was  
58 cleaned and centrifuged with ethanol solution for several times and dried at 60 °C for overnight. The  
59 obtained PtFe complex precursor powder (800 mg) and HNC powder (800 mg) were respectively  
60 dispersed in 200 mL of ethanol solution, followed by ultrasonic treatment and magnetic stirring for 2  
61 hours to make them relatively more dispersed. Then, the powder dispersions were thoroughly stirred  
62 and mixed by ultrasonic stirring and finally dried at 60 °C for overnight to obtain the black-red PtFe  
63 compound/HNC composite powder. Ultimately, the prepared PtFe compound/HNC composite  
64 precursor powder was annealed at 700 °C under Ar atmosphere for 6 hours to obtain an ordered PtFe  
65 alloy/high nitrogen-content carbon composite electrocatalyst, named as PtFe@HNC.

66 **Materials Characterization:** The samples' morphology, mean nanoparticle size and crystal plane  
67 structure were respectively observed through scanning electron microscopy (SEM, SIRION200, 3 kV)  
68 and transmission electron microscopy (TEM, JEM-2100F, 200 kV). The high-angle annular dark-field  
69 scanning transmission electron microscopy (HAADF-STEM) and energy dispersive spectroscopy  
70 (EDS) mapping images were obtained using high-resolution transmission electron microscopy  
71 (HRTEM, FEI Talos F200X, 200 kV). The X-ray diffraction (XRD) image was performed on a X'Pert  
72 through the graphite monochromatized  $\text{Cu-K}\alpha$  radiation ( $\lambda=1.54178\text{\AA}$ ) from 20° to 80°. The  
73 Brunauer–Emmett–Teller (BET) surface area, and relative pore size distribution analysis were done  
74 on a Tristar II 3020M. The X-ray photoelectron spectroscopy (XPS) was measured on a Thermo  
75 ESCALAB 250Xi with the  $\text{Al K}\alpha$  =1486.6 eV. The metal loading was obtained from Inductively  
76 coupled plasma atomic emission spectroscopy (ICP-AES, Optima 7300 DV) equipment.

77 **Electrochemical Measurements:** All electrochemical tests were completed on the electrochemical  
78 workstation (CHI 660E) with standard three-electrode system using Ag/AgCl (3 M KCl) as the  
79 reference electrode, glassy carbon electrode (GCE, diameter 3 mm) as the working electrode, and  
80 platinum wire as the counter electrode. The catalyst slurry was obtained by adding 2 mg as-prepared  
81 sample into the mixture solution of 500  $\mu\text{l}$  deionized water, 500  $\mu\text{l}$  absolute ethanol and 30  $\mu\text{l}$  Nafion

82 (D520, 5 wt%) and ultrasonicated for 60 minutes. Then, 5  $\mu$ l of the catalyst ink (2 mg/ml, 14.5 wt% Pt  
83 loading measured by ICP-AES) was dripped onto a pre-cleaned GCE and naturally dried to form a  
84 uniform film. All electrochemical measurements were conducted in N<sub>2</sub>-saturated sulfuric acid medium.

85 For methanol oxidation reaction (MOR) testing, the working electrode was activated in 0.5 M  
86 H<sub>2</sub>SO<sub>4</sub> aqueous solution through cycling potential between -0.2 and 1.0 V vs. Ag/AgCl for 50 cycles  
87 at 50 mV·s<sup>-1</sup> for the calculation of electrochemical specific area (ECSA) using the following equation<sup>3</sup>:  
88  $ECSA = Q_H / (M_{Pt} * 0.21 \text{ mC/cm}^2)$ , where Q<sub>H</sub> is the charge of H<sub>upd</sub> adsorption, M<sub>Pt</sub> is the loading amount  
89 of Pt, 0.21 mC/cm<sup>2</sup> is the charge of oxidizing monolayer of H<sub>2</sub> absorption on the surface. And then,  
90 CV curves were operated between 0 and 1.0 V vs. Ag/AgCl in 0.5 M H<sub>2</sub>SO<sub>4</sub> + 1 M CH<sub>3</sub>OH aqueous  
91 solution to determine the electrocatalysts' activity for MOR. To make the tests more rigorous, the  
92 loading content of Pt was determined as 14.5 wt% by ICP-AES. CA curves (4000 s, at 0.60 V vs.  
93 Ag/AgCl) and CV curves (1000 cycles, at 200 mV/s) were performed in 0.5 M H<sub>2</sub>SO<sub>4</sub> containing 1M  
94 CH<sub>3</sub>OH to check the durability of electrocatalysts.

95 For hydrogen evolution reaction (HER) testing, all potentials were transformed to RHE with the  
96 following equation<sup>4</sup>:  $E (RHE) = E (Ag/AgCl) + 0.226 \text{ V}$ . Firstly, the working electrode was activated  
97 in 0.5 M H<sub>2</sub>SO<sub>4</sub> solution through the potential cycling between 0.1 and -0.4 V vs. RHE at 50 mV/s  
98 until stable voltammogram curves were obtained. The electrocatalytic performance of HER was  
99 acquired by linear sweep voltammograms (LSV) at 5 mV/s and all polarization curves were corrected  
100 with iR compensation for 90%. The Tafel slope (b) was calculated with the following equation:  $\eta = a$   
101  $+ b \log (j)$ , where  $\eta$  is the overpotential (mV) and j is the current density (mA/cm<sup>2</sup>). Turnover  
102 frequency (TOF) values were obtained by the following equation:  $TOF (s^{-1}) = I / (2 * F * n)$ , where I is  
103 the current (mA) during the LSV testing, F is the Faraday's constant (96485 C/mol), n is the number  
104 of active sites (mol). Electrochemical impedance spectroscopy (EIS) spectra were recorded ranging  
105 from 100 kHz to 10 mHz with the amplitude of 10 mV. CV curves were operated by cycling potential  
106 between 0.1 and -0.4 V vs. RHE at 200 mV/s to evaluate the catalytic stability of catalysts for HER.  
107 Chronopotentiometric (CP) curve was performed at 10 mA/cm<sup>2</sup> to further verify the superior durability  
108 of PtFe@HNC electrocatalyst for HER.

109 Results

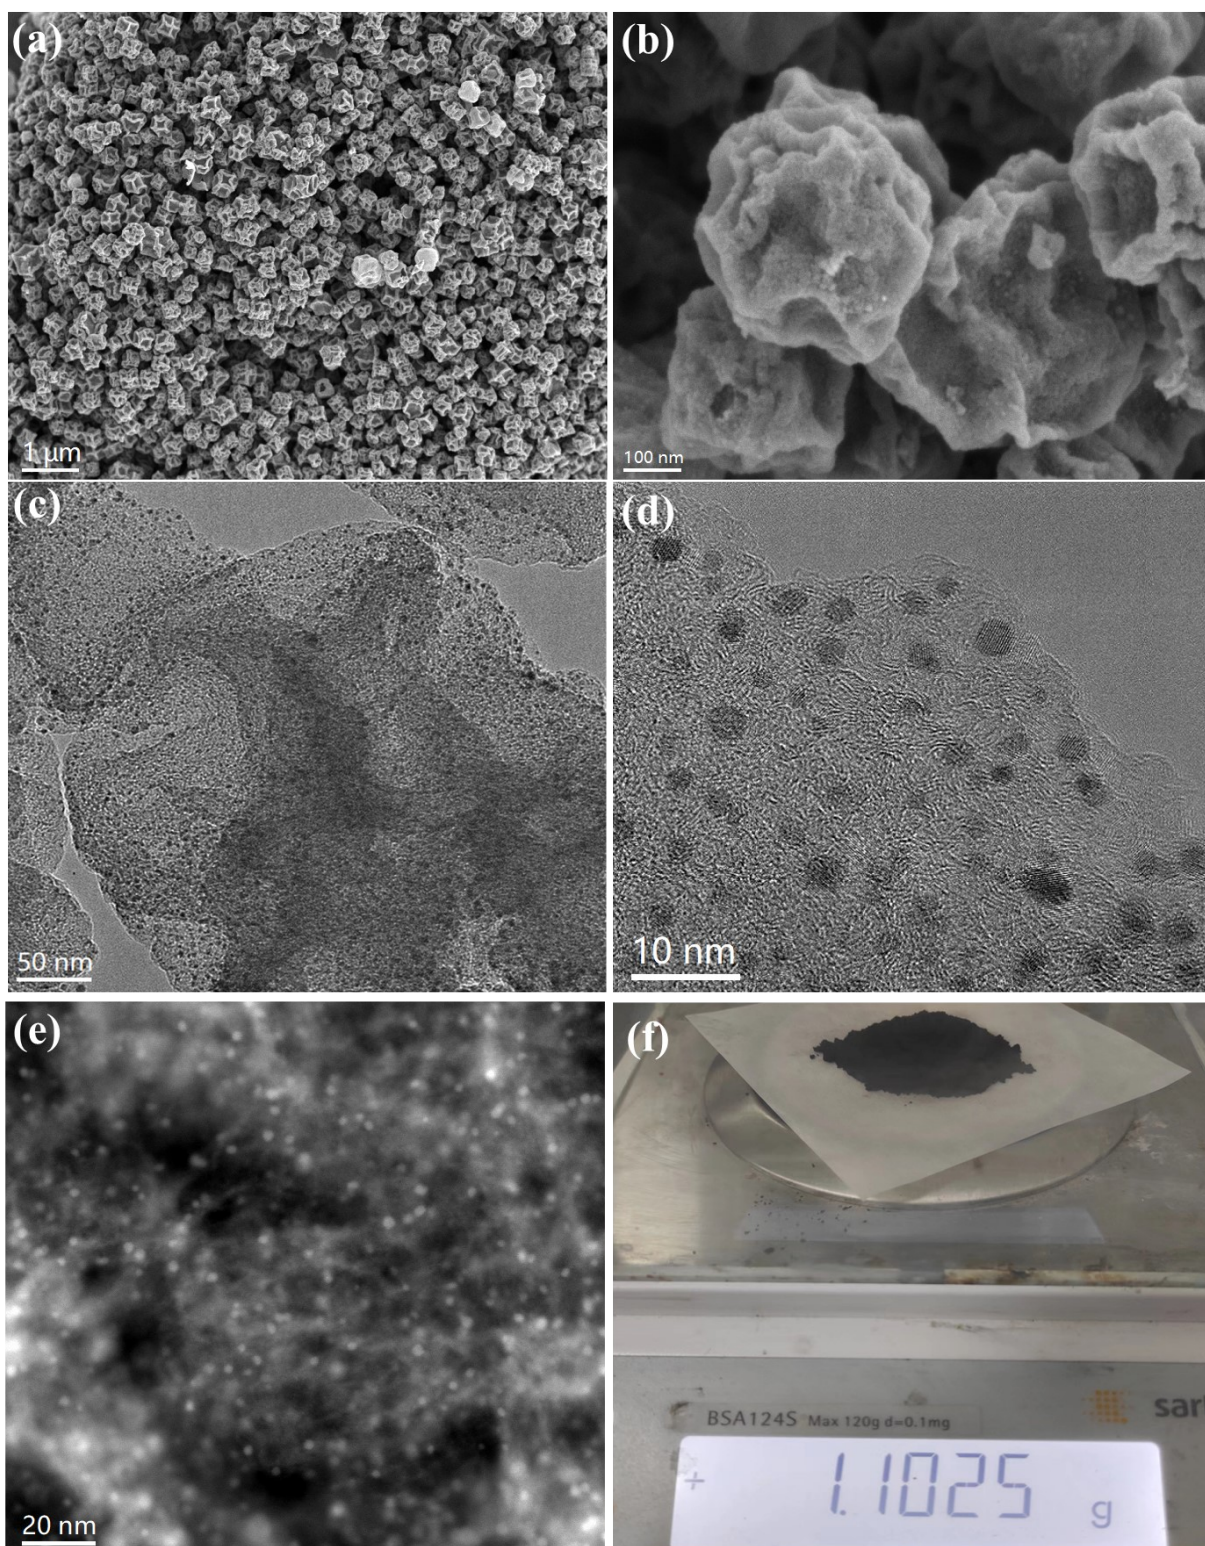

110

111 **Figure S1.** Physical characterization of the PtFe@HNC electrocatalyst. (a) and (b) SEM images. (c) and (d) TEM  
112 images. (e) HAADF-STEM image. (f) Electronic photo for the gram-scale synthesis of PtFe@HNC electrocatalyst.

113

114

**Table S1.** Lattice strain and ordering degree of PtFe@HNC.\*

| Sample            | 2 $\theta$ (degree)<br>(111) | Lattice spacing<br>d (Å) | Lattice constrain<br>(%) | Ordering degree<br>(%) |
|-------------------|------------------------------|--------------------------|--------------------------|------------------------|
| Pt-PDF# (04-0802) | 39.76                        | 2.27                     | --                       | --                     |
| PtFe@HNC          | 40.86                        | 2.25                     | -0.88                    | 79.25                  |

115 \* According to the parameters from XRD and HRTEM with the following equation:

$$116 \text{ Lattice strain } \varepsilon = \frac{d_{Pt-Fe} - d_{Pt-Pt}}{d_{Pt-Pt}} * 100\%$$

117 The ordering degree of PtFe@HNC was calculated through the following equation (2):

$$118 \text{ Ordering degree } I = \frac{S_{(110)}}{S_{(111)} + S_{(200)} + S_{(002)}} * 100\%$$

119 Where the  $S_{(110)}$ ,  $S_{(111)}$ ,  $S_{(200)}$ ,  $S_{(002)}$  respectively refers to the area of XRD powder diffraction peaks (110), (111),  
 120 (200) and (002). And the standard value of ordering degree for *fcc*-PtFe was 0.1843, which can be normalized to 100%  
 121 ordering intermetallic PtFe.<sup>2</sup>  
 122

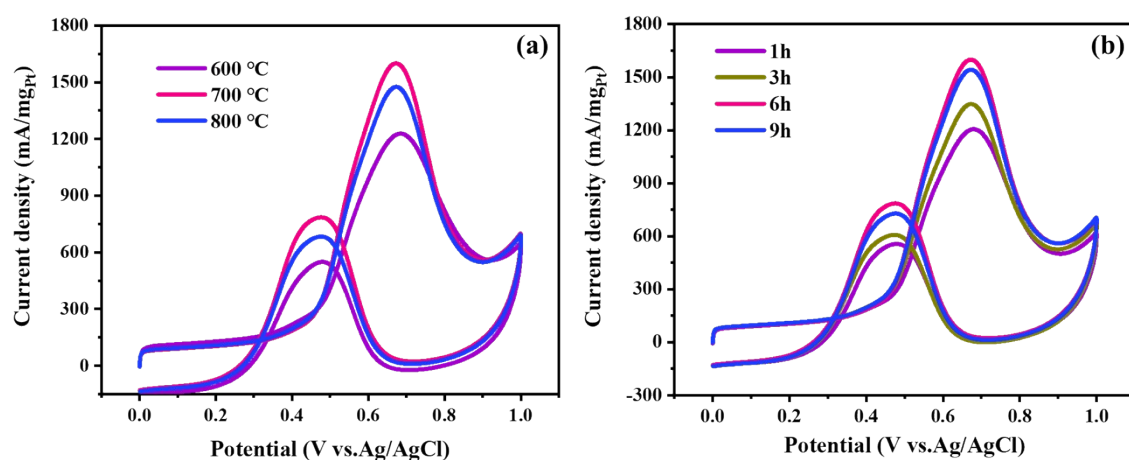

123

124 **Figure S2.** CV curves of PtFe@HNC with different annealing temperature (a) and time (b) in N<sub>2</sub>-saturated 0.5 M  
 125 H<sub>2</sub>SO<sub>4</sub> + 1 M CH<sub>3</sub>OH solution.

126

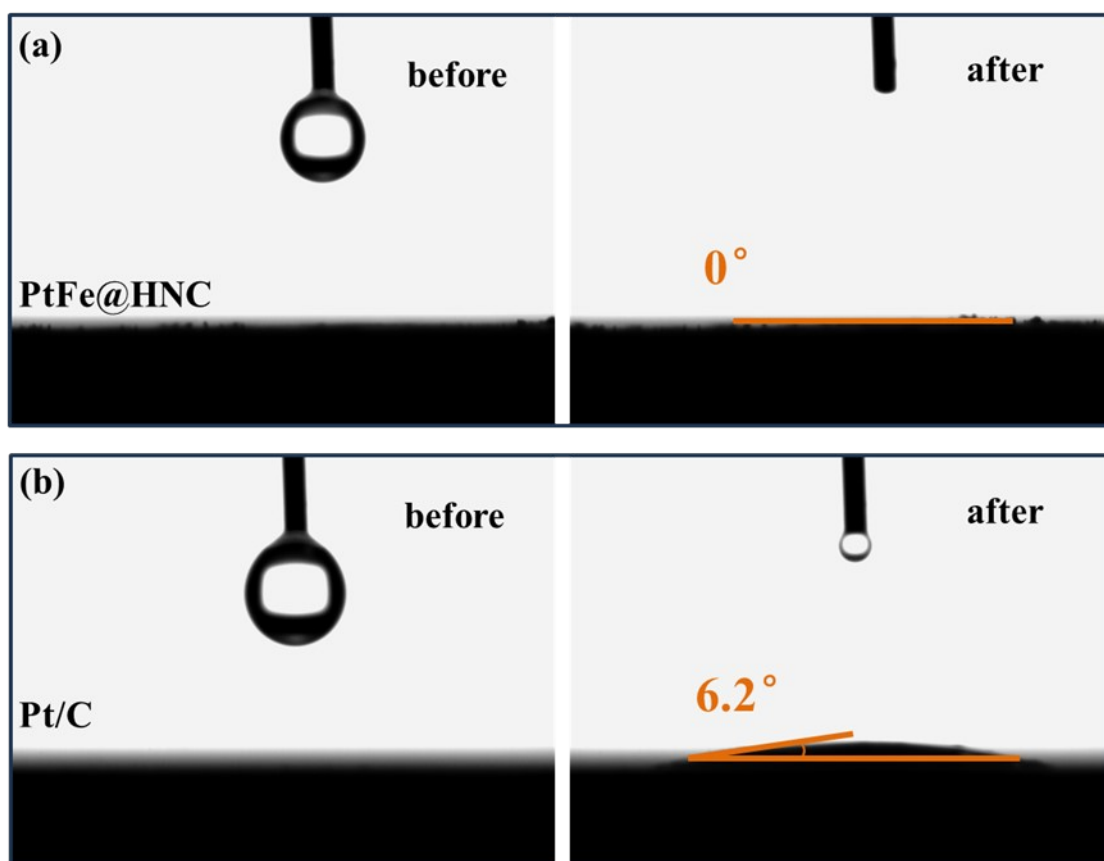

**Figure S3.** Contact angles of 0.5 M H<sub>2</sub>SO<sub>4</sub> solution with (a) PtFe@HNC and (b) Pt/C electrodes.

**Table S2.** Electrocatalytic activity of PtFe@HNC and commercial Pt/C toward MOR

| Samples  | ECSA (m <sup>2</sup> /g) | E <sub>onset</sub> (V) | I <sub>f</sub> (mA/mg <sub>Pt</sub> ) | I <sub>f</sub> /I <sub>b</sub> |
|----------|--------------------------|------------------------|---------------------------------------|--------------------------------|
| PtFe@HNC | 49.6                     | 0.30                   | 1599.3                                | 2.04                           |
| Pt/C     | 56.8                     | 0.41                   | 299.1                                 | 0.82                           |

**Table S3.** Summary of recently reported Pt-based electrocatalysts toward MOR.

| Samples                       | Electrolyte                                                      | Mass activity (mA/mg) | Specific activity (mA/cm <sup>2</sup> ) | Ref.      |
|-------------------------------|------------------------------------------------------------------|-----------------------|-----------------------------------------|-----------|
| PtFe@HNC                      | 0.5 M H <sub>2</sub> SO <sub>4</sub> +<br>1 M CH <sub>3</sub> OH | 1599.3                | 3.22                                    | This work |
| PtFe@a-FeO <sub>x</sub> /NC-C | 0.5 M H <sub>2</sub> SO <sub>4</sub> +<br>1 M CH <sub>3</sub> OH | 1480                  | 2.34                                    | 5         |
| Pt-SnO <sub>2</sub> -rGO      | 0.1 M HClO <sub>4</sub> +<br>1 M CH <sub>3</sub> OH              | 1310                  | 2.18                                    | 6         |

|                               |                                                                  |        |      |    |
|-------------------------------|------------------------------------------------------------------|--------|------|----|
| PtFeAu NCs                    | 0.5 M H <sub>2</sub> SO <sub>4</sub> +<br>1 M CH <sub>3</sub> OH | 1324   | 3.01 | 7  |
| PtFe/C@NC-3                   | 0.5 M H <sub>2</sub> SO <sub>4</sub> +<br>1 M CH <sub>3</sub> OH | 357.9  | 0.84 | 8  |
| PtRuFe<br>nanodendrites       | 0.5 M H <sub>2</sub> SO <sub>4</sub> +<br>1 M CH <sub>3</sub> OH | 1140   | 2.03 | 9  |
| PtFe@PtRuFe                   | 0.1 M HClO <sub>4</sub> +<br>1 M CH <sub>3</sub> OH              | 690    | 1.3  | 10 |
| Pt-Ni <sub>2</sub> P-Graphene | 0.5 M H <sub>2</sub> SO <sub>4</sub> +<br>1 M CH <sub>3</sub> OH | 1554.6 | 1.64 | 11 |
| PtIrCu-NCs                    | 0.1 M HClO <sub>4</sub> +<br>1 M CH <sub>3</sub> OH              | 863    | 1.04 | 12 |
| PtCoNiRh NWs                  | 0.1 M HClO <sub>4</sub> +<br>1 M CH <sub>3</sub> OH              | 1360   | 2.08 | 13 |
| PtNiP/P-graphene              | 0.5 M H <sub>2</sub> SO <sub>4</sub> +<br>1 M CH <sub>3</sub> OH | 826.1  | 0.65 | 14 |

133

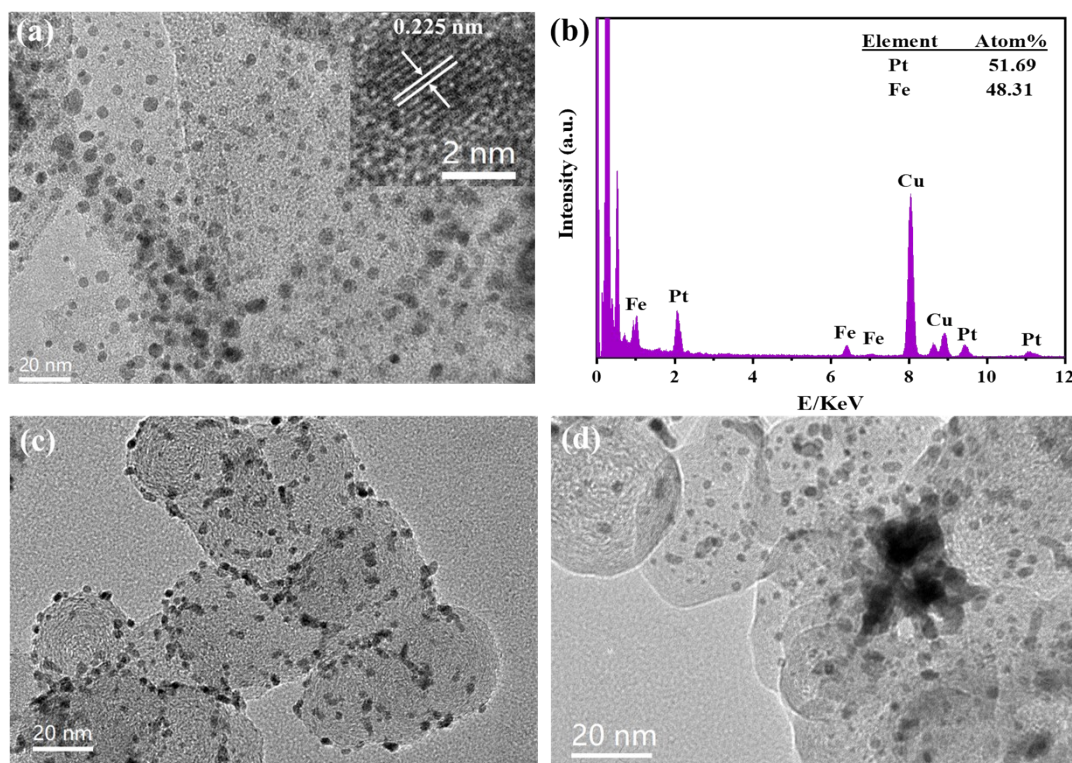

134

135 **Figure S4.** (a) and (b) TEM and STEM-EDS images of PtFe@HNC after 4000 s chronoamperometric measurement  
 136 toward MOR, the inset is HRTEM for interplanar spacing. (c) and (d) TEM images of commercial Pt/C before and  
 137 after 4000s chronoamperometric measurement toward MOR.



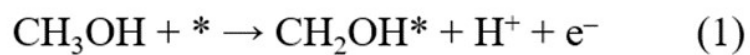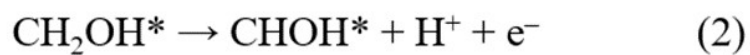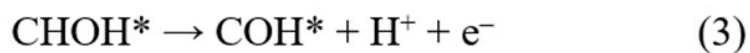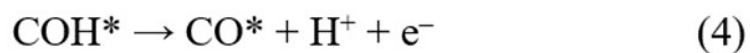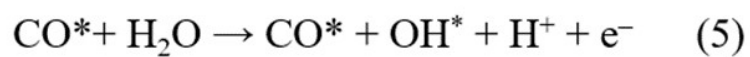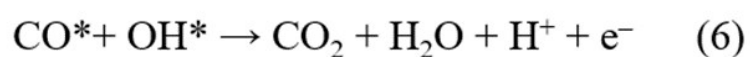

138

139 **Figure S5.** The involved multiple-electrons transfer routes for MOR.

140

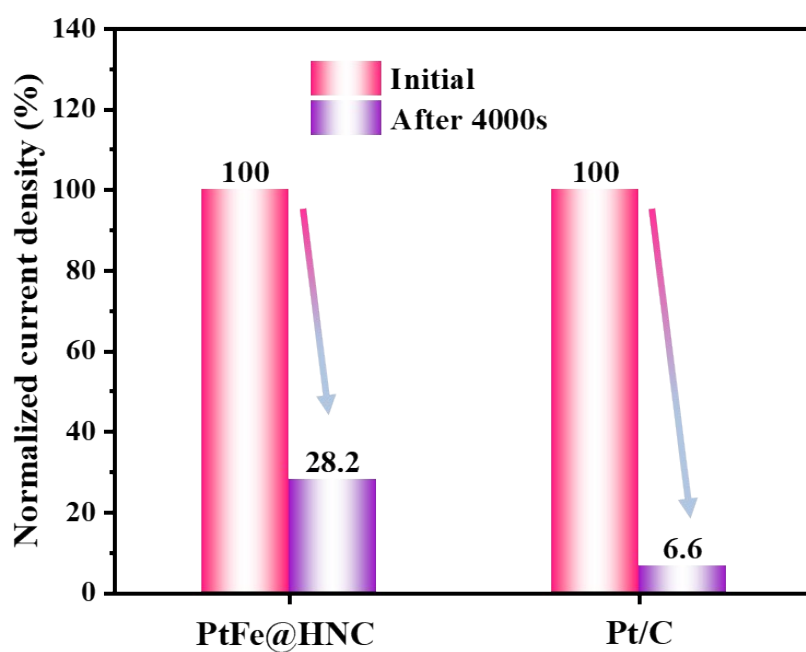

141

142 **Figure S6.** Retention of mass activity for PtFe@HNC and commercial Pt/C after 4000 s chronoamperometric  
143 measurement in N<sub>2</sub>-saturated 0.5 M H<sub>2</sub>SO<sub>4</sub> and 1 M CH<sub>3</sub>OH solution.

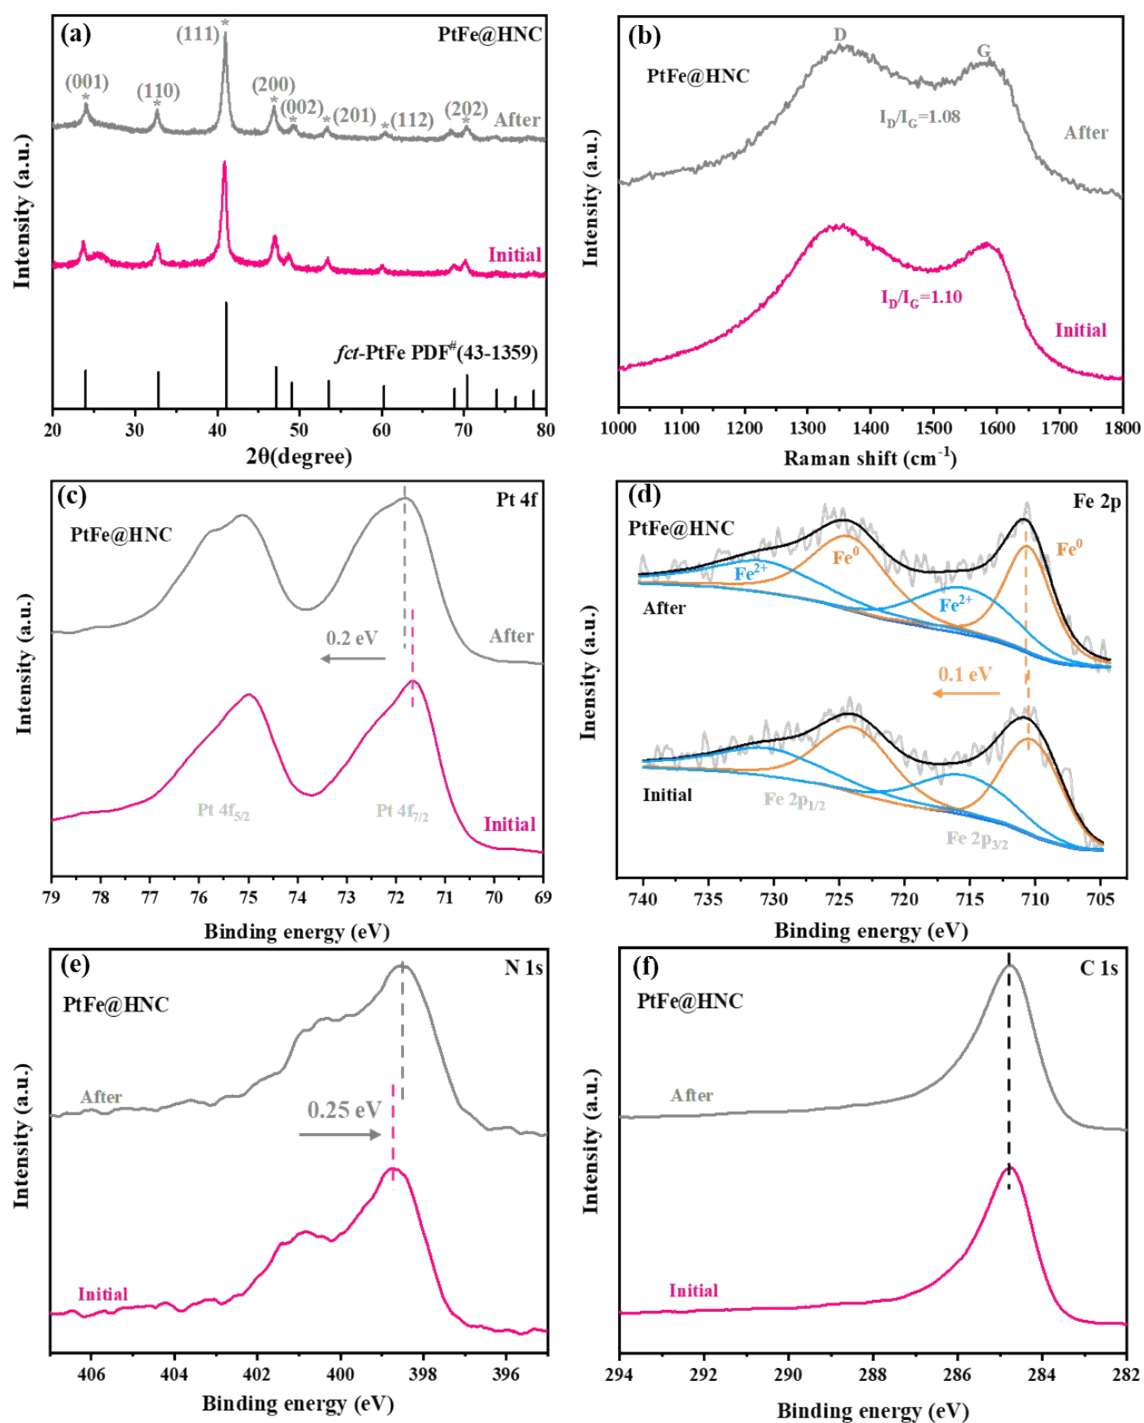

144

145 **Figure S7.** Crystalline structures, vibrational modes and elemental bonding states of the PtFe@HNC electrocatalyst  
 146 before and after 4000 s chronoamperometric MOR testing. (a) XRD patterns. (b) Raman spectra. (c) Pt 4f XPS  
 147 spectra. (d) Fe 2p XPS spectra. (e) N1s XPS spectra. (f) C1s XPS spectra.

148

149

150

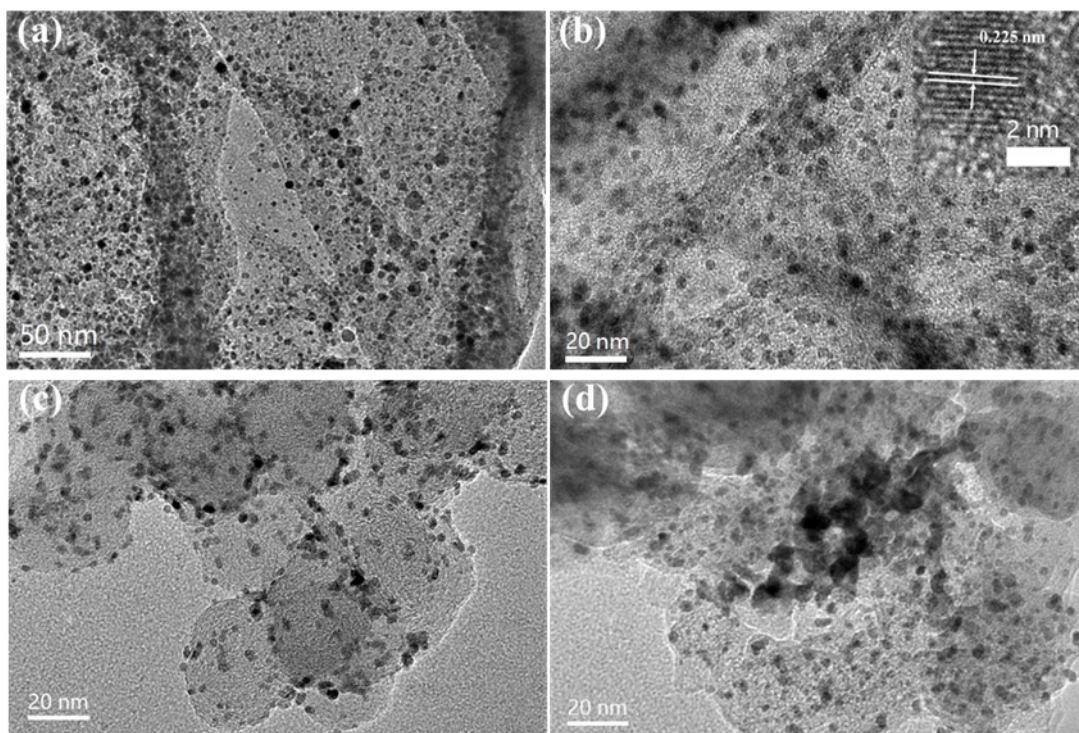

151  
 152 **Figure S8.** (a) and (b) TEM images of PtFe@HNC after accelerated 5000 sweeps toward HER, the inset is HRTEM  
 153 for interplanar spacing. (c) and (d) TEM images of commercial Pt/C before and after accelerated 5000 sweeps toward  
 154 HER.

155

156

**Table S4.** Summary of recently reported Pt-based electrocatalysts toward HER.

| Samples                             | Electrolyte                          | Overpotential (mV) | Tafel slop (mV/dec) | Ref.      |
|-------------------------------------|--------------------------------------|--------------------|---------------------|-----------|
| PtFe@HNC                            | 0.5 M H <sub>2</sub> SO <sub>4</sub> | 15                 | 12.5                | This work |
| Pt/NiCo@C                           | 0.5 M H <sub>2</sub> SO <sub>4</sub> | 17                 | 32                  | 15        |
| Pt/TiO <sub>2</sub> -O <sub>v</sub> | 0.5 M H <sub>2</sub> SO <sub>4</sub> | 18                 | 12                  | 16        |
| Pt <sub>5</sub> /HMCS               | 0.5 M H <sub>2</sub> SO <sub>4</sub> | 20.7               | 28.3                | 4         |
| Pt NPs/Siloxene                     | 0.5 M H <sub>2</sub> SO <sub>4</sub> | 24                 | 24.6                | 17        |
| Pt <sub>0.47</sub> -Ru/Acet         | 0.5 M H <sub>2</sub> SO <sub>4</sub> | 28                 | 33.3                | 18        |
| Pt-Ni NPs                           | 0.5 M H <sub>2</sub> SO <sub>4</sub> | 32                 | 51                  | 19        |

|                           |                                      |    |      |    |
|---------------------------|--------------------------------------|----|------|----|
| Pt/Mxene                  | 0.5 M H <sub>2</sub> SO <sub>4</sub> | 34 | 29.7 | 20 |
| ALD50Pt/NGNs              | 0.5 M H <sub>2</sub> SO <sub>4</sub> | 40 | 29   | 21 |
| Pt-NCs-Mxene              | 0.5 M H <sub>2</sub> SO <sub>4</sub> | 40 | 51   | 22 |
| Pt SA/m-WO <sub>3-x</sub> | 0.5 M H <sub>2</sub> SO <sub>4</sub> | 45 | 47   | 23 |
| CuTi@Pt                   | 0.5 M H <sub>2</sub> SO <sub>4</sub> | 46 | 33.3 | 24 |

---

157

## 158 References

- 159 1 R. Yun, T. Li, B. Zhang, et al., Amino induced high-loading atomically dispersed Co sites on N-doped hollow  
160 carbon for efficient CO<sub>2</sub> transformation, *Chemical Communications*, 2022, **58**, 6602-6605.
- 161 2 C. Yang, L. Wang, P. Yin, et al., Sulfur-anchoring synthesis of platinum intermetallic nanoparticle catalysts for  
162 fuel cells, *Science*, 2021, **374**, 459-464.
- 163 3 J. Yang, R. Hubner, J. Zhang, et al., A robust PtNi nanoframe/N-doped graphene aerogel electrocatalyst with  
164 both high activity and stability, *Angew. Chem., Int. Ed.*, 2021, **60**, 9590-9597.
- 165 4 X. Wan, H. Wu, B. Guan, et al., Confining Sub-nanometer Pt clusters in hollow mesoporous carbon spheres for  
166 boosting hydrogen evolution activity, *Advanced Materials*, 2020, **32**, e1901349.
- 167 5 W. Zhao, L. Ma, M. Gan, et al., Engineering intermetallic-metal oxide interface with low platinum loading for  
168 efficient methanol electrooxidation, *Journal of Colloid and Interface Science*, 2021, **604**, 52-60.
- 169 6 Y. W. Zhou, Y. F. Chen, K. Jiang, et al., Probing the enhanced methanol electrooxidation mechanism on  
170 platinum-metal oxide catalyst, *Applied Catalysis B: Environmental*, 2021, **280**, 119393.
- 171 7 Z. Cai, Z. Lu, Y. Bi, et al., Superior anti-CO poisoning capability: Au-decorated PtFe nanocatalysts for high-  
172 performance methanol oxidation, *Chemical Communications*, 2016, **52**, 3903-3906.
- 173 8 Y. Nie, X. Qi, R. Wu, et al., Structurally ordered PtFe intermetallic nanocatalysts toward efficient  
174 electrocatalysis of methanol oxidation, *Applied Surface Science*, 2021, **569**, 151004.
- 175 9 Z. Cai, Y. Kuang, X. Qi, et al., Ultrathin branched PtFe and PtRuFe nanodendrites with enhanced electrocatalytic  
176 activity, *Journal of Materials Chemistry A*, 2021, **3**, 1182-1187.
- 177 10 Q. Wang, S. Chen, P. Li, et al., Surface Ru enriched structurally ordered intermetallic PtFe@PtRuFe core-shell  
178 nanostructure boosts methanol oxidation reaction catalysis, *Applied Catalysis B: Environmental*, 2019, **252**,  
179 120-127.

- 180 11 H. Liu, D. Yang Y. Bao, et al., One-step efficiently coupling ultrafine Pt–Ni<sub>2</sub>P nanoparticles as robust catalysts  
181 for methanol and ethanol electro-oxidation in fuel cells reaction, *Journal of Power Sources*, 2019, **434**, 226754.
- 182 12 Y. H. Ahmad, H. A. El-Sayed, A. T. Mohamed, et al., Rational one-pot synthesis of ternary PtIrCu nanocrystals  
183 as robust electrocatalyst for methanol oxidation reaction, *Applied Surface Science*, 2020, **534**, 147617.
- 184 13 W. Wang, X. Chen, X. Zhang, et al., Quatermetallic Pt-based ultrathin nanowires intensified by Rh enable highly  
185 active and robust electrocatalysts for methanol oxidation, *Nano Energy*, 2020, **71**, 104623.
- 186 14 L. Yang, G. Li, R. Ma, et al., Nanocluster PtNiP supported on graphene as an efficient electrocatalyst for  
187 methanol oxidation reaction, *Nano Research*, 2021, **214**, 853-2860.
- 188 15 G. Jiang, C. Zhang, X. Liu, et al., Electrocatalytic hydrogen evolution of highly dispersed Pt/NC nanoparticles  
189 derived from porphyrin MOFs under acidic and alkaline medium, *International Journal of Hydrogen Energy*,  
190 2022, **47**, 6631.
- 191 16 Z. Wu, P. Yang, Q. Li, et al., Microwave synthesis of Pt clusters on black TiO<sub>2</sub> with abundant oxygen  
192 vacancies for efficient acidic electrocatalytic hydrogen evolution, *Angew. Chem. Int. Ed.*, 2023, **62**, e202300406.
- 193 17 Q. Chen, C. Du, Y. Yang, Q. Shen, J. Qin, M. Hong, X. Zhang, J. Chen, Two-dimensional siloxene as an  
194 advanced support of platinum for superior hydrogen evolution and methanol oxidation electrocatalysis,  
195 *Materials Today Physics*, 2023, **30**, 100931.
- 196 18 Y. Chen, J. Li, N. Wang, Y. Zhou, J. Zheng, W. Chu, Plasma-assisted highly dispersed Pt single atoms on Ru  
197 nanoclusters electrocatalyst for pH-universal hydrogen evolution, *Chemical Engineering Journal*, 2022, **448**,  
198 137611.
- 199 19 H. Zhai, G. Xu, J. Liu, T. Xu, C. Li, J. Bai, Boosting activity and stability by coupling Pt–Ni nanoparticles with  
200 La-modified flexible carbon nanofibers for hydrogen evolution reaction, *International Journal of Hydrogen*  
201 *Energy*, 2022, **47**, 2423.
- 202 20 Y. Wu, W. Wei, R. Yu, L. Xia, et al., Anchoring sub-nanometer Pt clusters on crumpled paper-like MXene  
203 enables high hydrogen evolution mass activity, *Advanced Functional Materials*, 2022, **32**, 2110910.
- 204 21 N. Cheng, S. Stambula, D. Wang, et al., Platinum single-atom and cluster catalysis of the hydrogen evolution  
205 reaction, *Nat. Commun.*, 2016, **7**, 13638.
- 206 22 X. Jian, T. T. Wei, M. M. Zhang, R. Li, J. X. Liu, Z. H. Liang, Construction of Ti<sub>3</sub>C<sub>2</sub>T<sub>x</sub> MXene supported low-  
207 platinum electrocatalyst for hydrogen evolution reaction by direct electrochemical strategy, *Journal of the*  
208 *Electrochemical Society*, 2021, **168**, 096504.
- 209 23 J. Park, S. Lee, H. E. Kim, et al., Investigation of the support effect in atomically dispersed Pt on WO<sub>(3-x)</sub> for  
210 utilization of Pt in the hydrogen evolution reaction, *Angew. Chem. Int. Ed.*, 2019, **58**, 16038.
- 211 24 T. Chuyen Phan, V. T. Nguyen, H. S. Choi, H. Kim, Highly efficient and durable electrochemical hydrogen  
212 evolution reaction based on composition/shape controlled CuTi@Pt core-shell nanotubes in acidic media,  
213 *Applied Surface Science*, 2022, **605**, 154331.
